# Supplementary figures and images for: Synergistic Antitumor Effect of Combined Radiotherapy and Engineered Salmonella typhimurium in an Intracranial Sarcoma Mouse Model
Source: MDPI journal article supplement (doi:10.3390/vaccines11071275), 2023-07-23

Day 4

Mouse 1

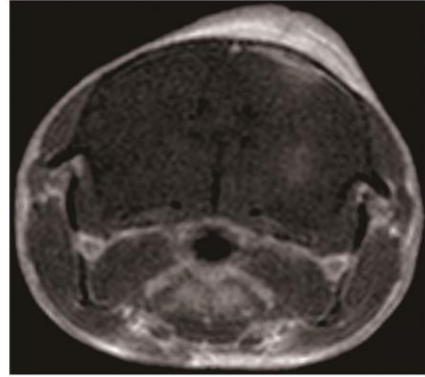

Mouse 2

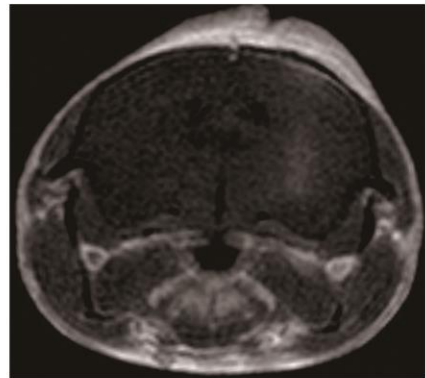

Mouse 3

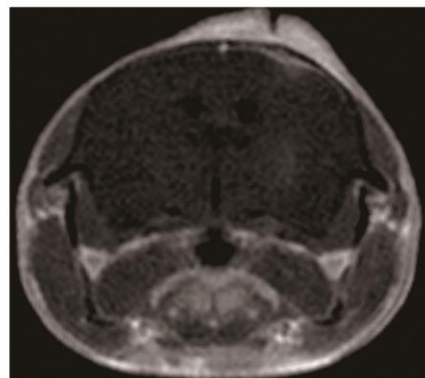

Supplement: s1 [file s1]
